# Supplementary material for: Statins ameliorate cholesterol-induced inflammation and improve AQP2 expression by inhibiting NLRP3 activation in the kidney
Source: PubMed Central journal article supplement (PMC7482822; doi:10.7150/thno.49603), 2020-08-20

## SUPPLEMENTARY DATA

S1

### Primer sequences for RT-PCR (mouse)

| Target Gene    | Primer Sequence         |
|----------------|-------------------------|
| NLRP3 F        | ATTACCCGCCCGAGAAAGG     |
| NLRP3 R        | CATGAGTGTGGCTAGATCCAAG  |
| Caspase-1 F    | ACAAGGCACGGGACCTATG     |
| Caspase-1 R    | TCCCAGTCAGTCCTGGAAATG   |
| ASC F          | ACAGGCTGTGATACGACTAAAGA |
| ASC R          | CATTTGCCGTTTCGGTGGA     |
| IL-1 $\beta$ F | GAAATGCCACCTTTTGACAGTG  |
| IL-1 $\beta$ R | TGGATGCTCTCATCAGGACAG   |
| V2R F          | GCTGTGGCTCTGTTTCAAGTG   |
| V2R R          | CCAGGATCATGTAGGAAGAGGC  |
| AQP2 F         | GGACCTGGCTGTCAATGCTC    |
| AQP2 R         | GCGGGCTGGATTCATGGAG     |

---

**Primer sequences for RT-PCR (Rat)**

---

| Target Gene    | Primer Sequence             |
|----------------|-----------------------------|
| AQP2 F         | TGACCTCAACTACATGGTCTACA     |
| AQP2 R         | GCGGGCTGGATTCATGGAG         |
| AQP3 F         | AGCAGATCTGAGTGGGCAGT        |
| AQP3 R         | CTTGGGCTTAAGAGGGGAAC        |
| NKCC2 F        | CGGGTCGTCTAGATCCAAAA        |
| NKCC2 R        | ATGGA CT TGGAAACGACTGG      |
| NLRP3 F        | CGAGACCTCTGGGAAAAAGCT       |
| NLRP3 R        | GCATACCATAGAGGAATGTGATGTACA |
| Caspase-1 F    | GATGGCACATTTCCAGGACTGA      |
| Caspase-1 R    | TGTTGCAGATAATGAGGGCAAGAC    |
| ASC F          | ACTTCTGTGACCCTGGCAATGAG     |
| ASC R          | GCTGAGCAGCTGCAAACGAC        |
| IL-1 $\beta$ F | GAAATGCCACCTTTTGACAGTG      |
| IL-1 $\beta$ R | TGGATGCTCTCATCAGGACAG       |

---

**S2A****Diagnosis of patients with kidney diseases in Figure1**

| Diagnosis                           | Case Number                        |
|-------------------------------------|------------------------------------|
| IgA nephropathy                     | 2006, 2007, 2018, 2027, 2035, 2036 |
| Nephrotic syndrome                  | 2013, 2016, 2028, 2029, 2037, 2039 |
| Interstitial nephritis              | 2024                               |
| ANCA related vasculitis/CKD stage 5 | 2008                               |
| Lupus nephritis                     | 2025                               |
| Chronic glomerulonephritis          | 2043                               |
| Henoch-Schonlein purpura            | 2011                               |

**Supplementary data figure legends:**

**S2B Figure.** Co-localization of AQP2 and ASC in Figure 1D was analyzed by calculation of the Pearson's coefficient.

**S3 Figure.** Genotyping of *nlrp3*<sup>+/+</sup> and *nlrp3*<sup>-/-</sup> mice

**S4 Figure.** Increased body size and abdominal fat in *nlrp3*<sup>+/+</sup> mice compared to *nlrp3*<sup>-/-</sup> mice with HFD for 12 weeks.

**S5 Figure.** Quantitative analysis of immunofluorescence intensity of AQP2 and ASC in Figure 5C.

**S6 Figure.** (A) Protein expression of AQP2 in cholesterol-treated primary IMCD suspensions with or without dDAVP 10<sup>-7</sup> M treatment. (B) Protein expression of AQP2 in primary IMCD suspensions with or without ATO treatment.

**S7 Figure.** (A) and (B) Protein expression of SQSTM1 and LC3B in

cholesterol-treated primary IMCD suspensions with or without ATO treatment.

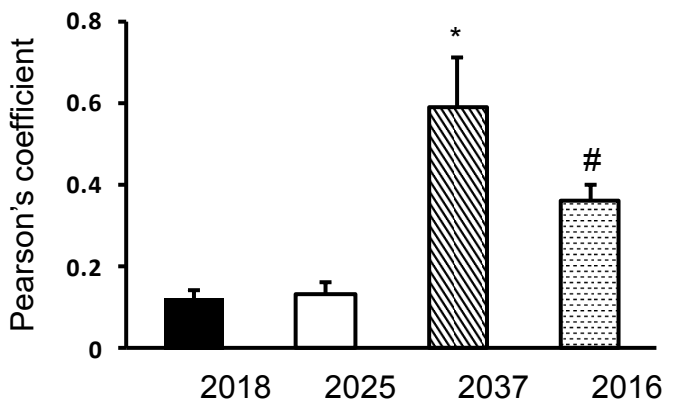

**A**

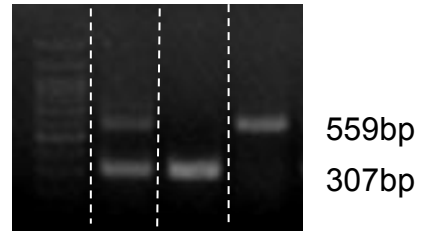

Marker +/- -/- +/+

559bp  
307bp

Supplementary data: S4

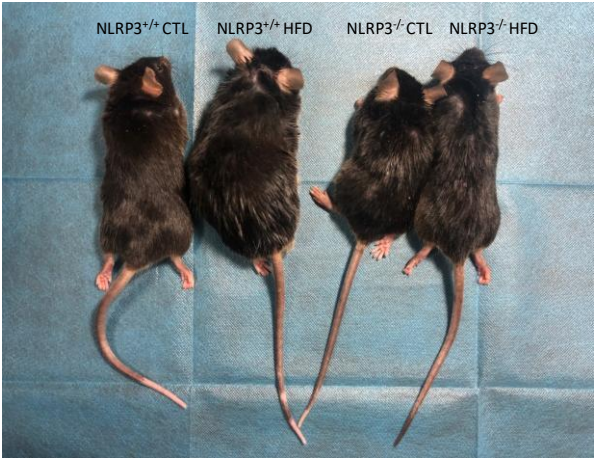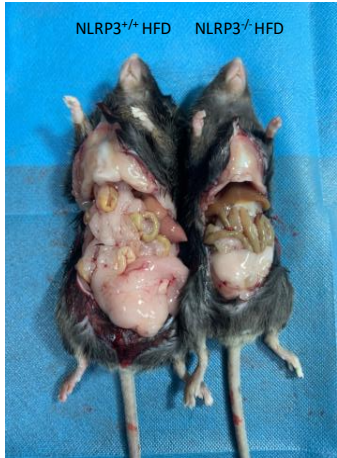

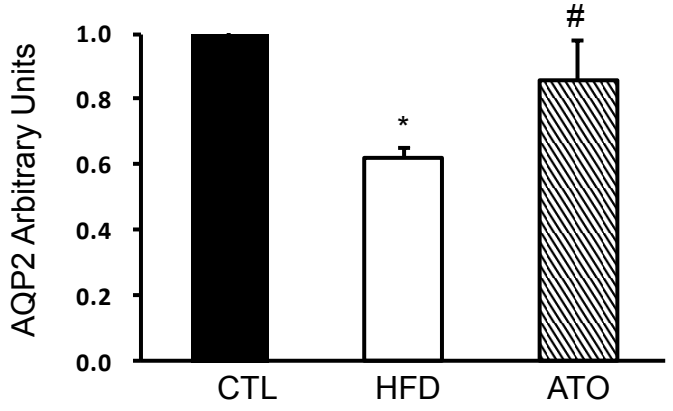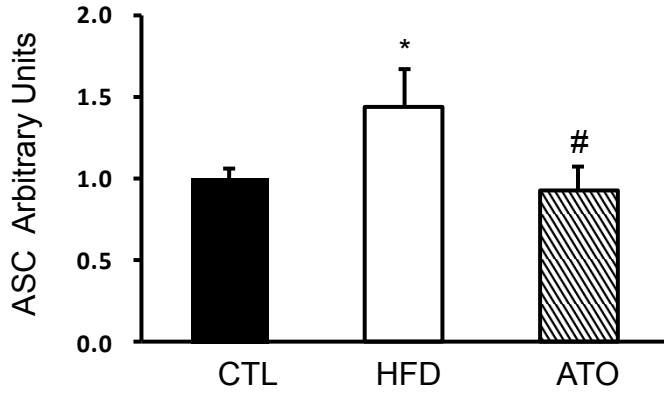



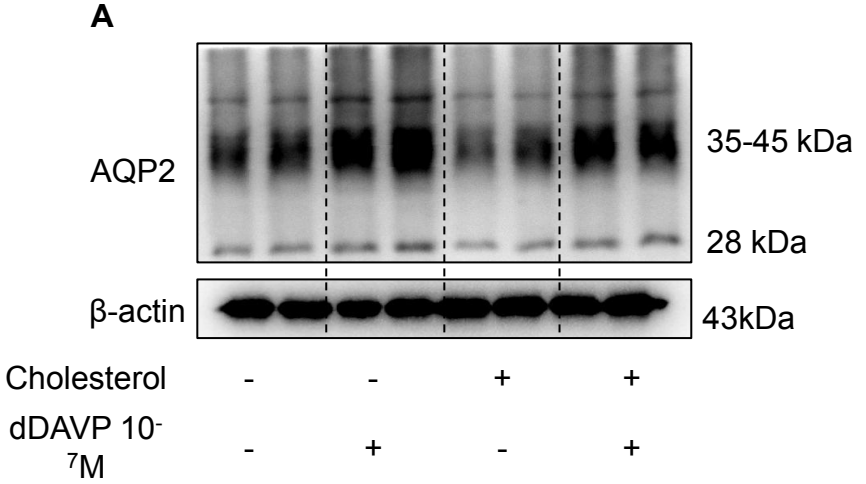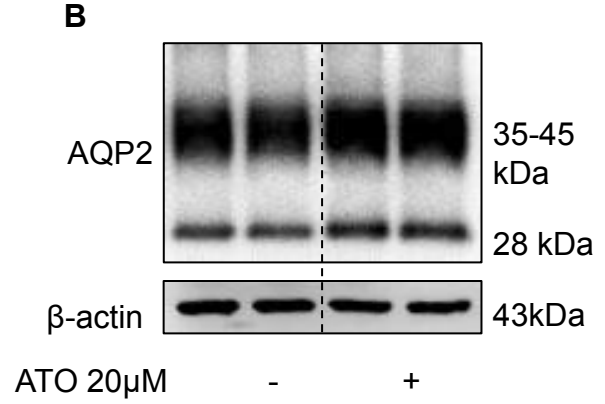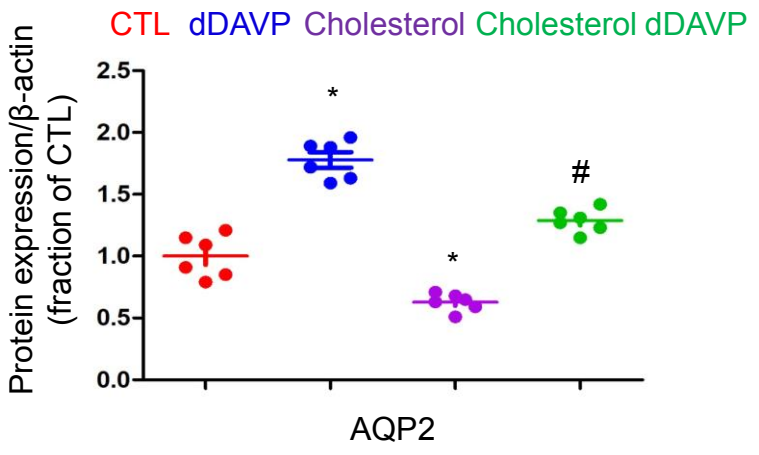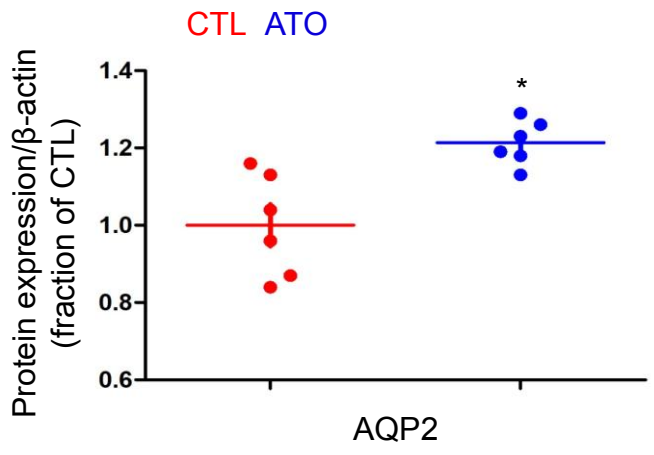

**A**

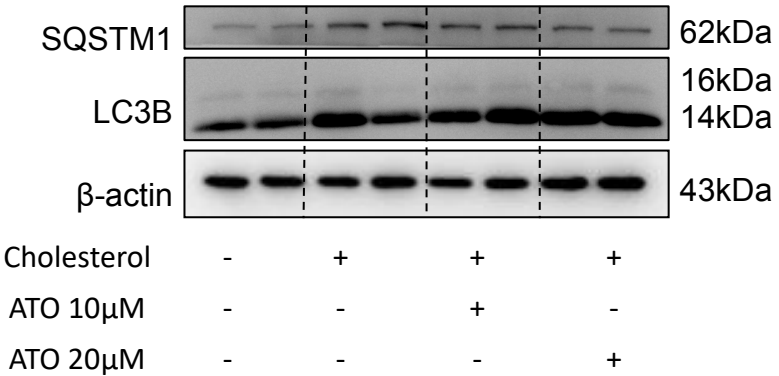

**B**

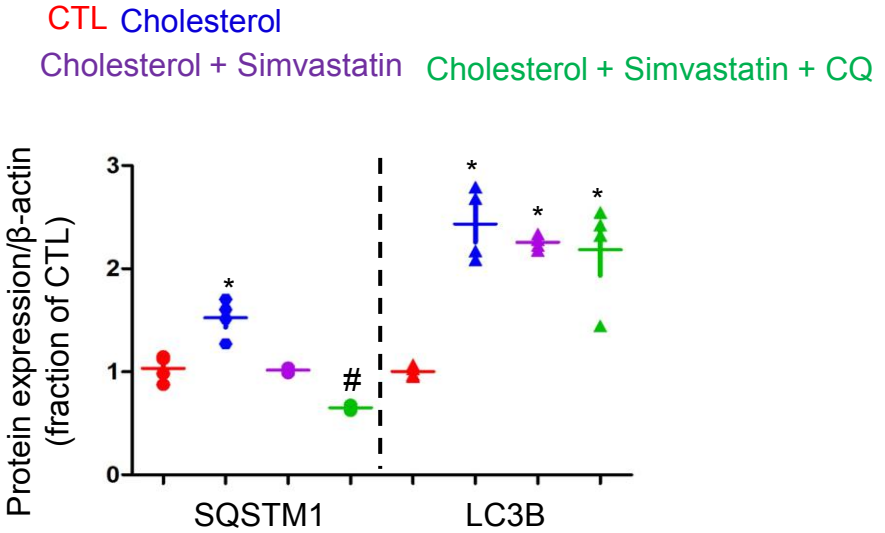

Supplement: thnov10p10415s1.pdf [file thnov10p10415s1.pdf]
